# Supplementary material for: Stakeholders’ perceptions of policy options to support the integration of community health workers in health systems
Source: Springer Nature journal article supplement (doi:10.1186/s12960-019-0348-6), 2019-02-18
Supplement: MOESM1 [file 16488836]

## Stakeholders' perception survey on the implementation of the WHO guidelines on health policy and system support to optimize community health worker programmes

### Policy guidelines on health policy and system support to optimize community health worker programmes

#### Introduction

The World Health Organization (WHO) is developing policy guidelines on health policy and system support to optimize community health worker programmes. We are conducting the present survey to better understand the views of stakeholders in relation to the feasibility and acceptability of some of the interventions and recommendations under consideration, and the values assigned to the outcomes of the interventions.

**Note to participants:** This survey asks for your perception about the feasibility and acceptability of the interventions and your assessment of how important the outcome measures are to ensure successful implementation. The information obtained will be analysed and primarily used to support the ongoing development of the guidelines on health systems and policy support for community health workers. Responses provided are anonymous and remain confidential; only aggregate findings will be presented and/ or published by WHO. Participation in the survey is voluntary; you have the right to refuse to respond to any or all questions, but we kindly request that you answer as many questions as possible in order to help us to have relevant and helpful information. We will consider your consent is given when you choose to take the survey and “pressing NEXT” as recognition of your voluntary participation. Completion of the questionnaire should take approximately 20 minutes and you will be able to save your answers as you go along, or return to them at a later time. Please complete the ratings from your own perspective, taking into account your specific/local context. You can find descriptions of the outcome measures in the accompanying glossary.

You may also choose to add explanations to your ratings or offer other comments in the open questions at the end.

Should you encounter any questions on which you would like further clarification or guidance, please feel free to contact [ajueboro@who.int](mailto:ajueboro@who.int) with your questions. You can find more information regarding the guideline development process at [www.who.int/hrh/community/en/](http://www.who.int/hrh/community/en/)

Thank you for completing this survey!

\* 1. Age

- 18 to 30
- 31 to 50
- 51 to 64
- > 64

2. Gender

- Female
- Male

\* 3. Institution

- Non-governmental organization (NGO) or community Based organization (CBO)
- International/ multilateral organization (NGO)
- Governmental organization
- Academic/ research institution
- Private for profit organization
- Other

4. If you answered other to the question 3 above, please specify

\* 5. Highest attained education degree

- Primary school certificate
- Secondary school certificate or diploma
- Bachelor's degree (e.g. BSc)
- Master's degree (e.g. MSc, MA)
- Doctoral degree (MD, PhD or equivalent)
- None of the above

\* 6. WHO Region

- Africa
- South and South East Asia
- Americas
- Europe
- The Eastern Mediterranean
- The Western Pacific

\* 7. Please specify your Country

\* 8. Occupation

- Community health worker
- Health Professional or health worker (other than community health worker) involved in the direct delivery of health services :
- Health policy maker/ health planner
- Health services manager and/ or administrator
- Other

9. If you answered other to question 8 above, please specify

\* 10. Level of responsibility

- District (within a country)
- National (at the country level)
- Regional (at a level broader than national)
- International
- Not applicable

11. Please rate on the scale of 1-9, how important you think the following results measures are for assessing the outputs, outcomes and impact of the CHW guideline recommendations

|                                                                            | Not<br>important<br>(1) | Not<br>important<br>(2) | Not<br>important<br>(3) | Important<br>(4)      | Important<br>(5)      | Important<br>(6)      | Critical (7)          | Critical (8)          | Critical (9)          |
|----------------------------------------------------------------------------|-------------------------|-------------------------|-------------------------|-----------------------|-----------------------|-----------------------|-----------------------|-----------------------|-----------------------|
| Increased CHW <b>motivation</b>                                            | <input type="radio"/>   | <input type="radio"/>   | <input type="radio"/>   | <input type="radio"/> | <input type="radio"/> | <input type="radio"/> | <input type="radio"/> | <input type="radio"/> | <input type="radio"/> |
| Improved CHW <b>morale</b>                                                 | <input type="radio"/>   | <input type="radio"/>   | <input type="radio"/>   | <input type="radio"/> | <input type="radio"/> | <input type="radio"/> | <input type="radio"/> | <input type="radio"/> | <input type="radio"/> |
| Decreased CHW <b>absenteeism</b>                                           | <input type="radio"/>   | <input type="radio"/>   | <input type="radio"/>   | <input type="radio"/> | <input type="radio"/> | <input type="radio"/> | <input type="radio"/> | <input type="radio"/> | <input type="radio"/> |
| Increased CHW <b>productivity</b>                                          | <input type="radio"/>   | <input type="radio"/>   | <input type="radio"/>   | <input type="radio"/> | <input type="radio"/> | <input type="radio"/> | <input type="radio"/> | <input type="radio"/> | <input type="radio"/> |
| Improved CHW <b>responsiveness</b>                                         | <input type="radio"/>   | <input type="radio"/>   | <input type="radio"/>   | <input type="radio"/> | <input type="radio"/> | <input type="radio"/> | <input type="radio"/> | <input type="radio"/> | <input type="radio"/> |
| Decrease in CHW <b>attrition</b> rates                                     | <input type="radio"/>   | <input type="radio"/>   | <input type="radio"/>   | <input type="radio"/> | <input type="radio"/> | <input type="radio"/> | <input type="radio"/> | <input type="radio"/> | <input type="radio"/> |
| Improved CHW <b>competencies</b>                                           | <input type="radio"/>   | <input type="radio"/>   | <input type="radio"/>   | <input type="radio"/> | <input type="radio"/> | <input type="radio"/> | <input type="radio"/> | <input type="radio"/> | <input type="radio"/> |
| Increased <b>access</b> to care for patients                               | <input type="radio"/>   | <input type="radio"/>   | <input type="radio"/>   | <input type="radio"/> | <input type="radio"/> | <input type="radio"/> | <input type="radio"/> | <input type="radio"/> | <input type="radio"/> |
| Increased health services <b>coverage</b>                                  | <input type="radio"/>   | <input type="radio"/>   | <input type="radio"/>   | <input type="radio"/> | <input type="radio"/> | <input type="radio"/> | <input type="radio"/> | <input type="radio"/> | <input type="radio"/> |
| Improved <b>quality</b> of CHW health services                             | <input type="radio"/>   | <input type="radio"/>   | <input type="radio"/>   | <input type="radio"/> | <input type="radio"/> | <input type="radio"/> | <input type="radio"/> | <input type="radio"/> | <input type="radio"/> |
| Better <b>health care-seeking</b> behaviour of individuals and communities | <input type="radio"/>   | <input type="radio"/>   | <input type="radio"/>   | <input type="radio"/> | <input type="radio"/> | <input type="radio"/> | <input type="radio"/> | <input type="radio"/> | <input type="radio"/> |
| <b>Health-promoting</b> behaviours in homes and communities                | <input type="radio"/>   | <input type="radio"/>   | <input type="radio"/>   | <input type="radio"/> | <input type="radio"/> | <input type="radio"/> | <input type="radio"/> | <input type="radio"/> | <input type="radio"/> |
| Improved <b>patient</b> satisfaction                                       | <input type="radio"/>   | <input type="radio"/>   | <input type="radio"/>   | <input type="radio"/> | <input type="radio"/> | <input type="radio"/> | <input type="radio"/> | <input type="radio"/> | <input type="radio"/> |
| Decrease in preventable <b>mortality</b> rates                             | <input type="radio"/>   | <input type="radio"/>   | <input type="radio"/>   | <input type="radio"/> | <input type="radio"/> | <input type="radio"/> | <input type="radio"/> | <input type="radio"/> | <input type="radio"/> |
| Improved <b>family</b> planning                                            | <input type="radio"/>   | <input type="radio"/>   | <input type="radio"/>   | <input type="radio"/> | <input type="radio"/> | <input type="radio"/> | <input type="radio"/> | <input type="radio"/> | <input type="radio"/> |
| Increased <b>equity</b>                                                    | <input type="radio"/>   | <input type="radio"/>   | <input type="radio"/>   | <input type="radio"/> | <input type="radio"/> | <input type="radio"/> | <input type="radio"/> | <input type="radio"/> | <input type="radio"/> |
| Improved <b>cost savings</b> by patients                                   | <input type="radio"/>   | <input type="radio"/>   | <input type="radio"/>   | <input type="radio"/> | <input type="radio"/> | <input type="radio"/> | <input type="radio"/> | <input type="radio"/> | <input type="radio"/> |
| Decreased <b>morbidity</b> rates                                           | <input type="radio"/>   | <input type="radio"/>   | <input type="radio"/>   | <input type="radio"/> | <input type="radio"/> | <input type="radio"/> | <input type="radio"/> | <input type="radio"/> | <input type="radio"/> |
| Decrease in levels of <b>discrimination</b>                                | <input type="radio"/>   | <input type="radio"/>   | <input type="radio"/>   | <input type="radio"/> | <input type="radio"/> | <input type="radio"/> | <input type="radio"/> | <input type="radio"/> | <input type="radio"/> |

12. Please rate on a scale of 1-9, how acceptable for implementation you think the following CHW interventions are



















|  | Definitely not feasible (1) | Definitely not feasible (2) | Definitely not feasible (3) | Uncertain whether feasible or not (4) | Uncertain whether feasible or not (5) | Uncertain whether feasible or not (6) | Definitely feasible (7) | Definitely feasible (8) | Definitely feasible (9) |
|--|-----------------------------|-----------------------------|-----------------------------|---------------------------------------|---------------------------------------|---------------------------------------|-------------------------|-------------------------|-------------------------|
|--|-----------------------------|-----------------------------|-----------------------------|---------------------------------------|---------------------------------------|---------------------------------------|-------------------------|-------------------------|-------------------------|

b) Simplified stock management tools and visual job aids for CHWs that accommodate low literacy with minimum data points to facilitate recording of data and re-supply

|                       |                       |                       |                       |                       |                       |                       |                       |                       |                       |
|-----------------------|-----------------------|-----------------------|-----------------------|-----------------------|-----------------------|-----------------------|-----------------------|-----------------------|-----------------------|
| <input type="radio"/> | <input type="radio"/> | <input type="radio"/> | <input type="radio"/> | <input type="radio"/> | <input type="radio"/> | <input type="radio"/> | <input type="radio"/> | <input type="radio"/> | <input type="radio"/> |
|-----------------------|-----------------------|-----------------------|-----------------------|-----------------------|-----------------------|-----------------------|-----------------------|-----------------------|-----------------------|

c) Use of mobile phone applications (mHealth) for reporting stock and other data

|                       |                       |                       |                       |                       |                       |                       |                       |                       |                       |
|-----------------------|-----------------------|-----------------------|-----------------------|-----------------------|-----------------------|-----------------------|-----------------------|-----------------------|-----------------------|
| <input type="radio"/> | <input type="radio"/> | <input type="radio"/> | <input type="radio"/> | <input type="radio"/> | <input type="radio"/> | <input type="radio"/> | <input type="radio"/> | <input type="radio"/> | <input type="radio"/> |
|-----------------------|-----------------------|-----------------------|-----------------------|-----------------------|-----------------------|-----------------------|-----------------------|-----------------------|-----------------------|

d) Co-ordination, supervision and standardization of resupply procedures, checklists and incentives

|                       |                       |                       |                       |                       |                       |                       |                       |                       |                       |
|-----------------------|-----------------------|-----------------------|-----------------------|-----------------------|-----------------------|-----------------------|-----------------------|-----------------------|-----------------------|
| <input type="radio"/> | <input type="radio"/> | <input type="radio"/> | <input type="radio"/> | <input type="radio"/> | <input type="radio"/> | <input type="radio"/> | <input type="radio"/> | <input type="radio"/> | <input type="radio"/> |
|-----------------------|-----------------------|-----------------------|-----------------------|-----------------------|-----------------------|-----------------------|-----------------------|-----------------------|-----------------------|

e) Products specifically designed for use by CHWs (presentation, strength, form and packaging)

|                       |                       |                       |                       |                       |                       |                       |                       |                       |                       |
|-----------------------|-----------------------|-----------------------|-----------------------|-----------------------|-----------------------|-----------------------|-----------------------|-----------------------|-----------------------|
| <input type="radio"/> | <input type="radio"/> | <input type="radio"/> | <input type="radio"/> | <input type="radio"/> | <input type="radio"/> | <input type="radio"/> | <input type="radio"/> | <input type="radio"/> | <input type="radio"/> |
|-----------------------|-----------------------|-----------------------|-----------------------|-----------------------|-----------------------|-----------------------|-----------------------|-----------------------|-----------------------|

f) Use of social media to manage redistribution

|                       |                       |                       |                       |                       |                       |                       |                       |                       |                       |
|-----------------------|-----------------------|-----------------------|-----------------------|-----------------------|-----------------------|-----------------------|-----------------------|-----------------------|-----------------------|
| <input type="radio"/> | <input type="radio"/> | <input type="radio"/> | <input type="radio"/> | <input type="radio"/> | <input type="radio"/> | <input type="radio"/> | <input type="radio"/> | <input type="radio"/> | <input type="radio"/> |
|-----------------------|-----------------------|-----------------------|-----------------------|-----------------------|-----------------------|-----------------------|-----------------------|-----------------------|-----------------------|

14. Where you would like to clarify, please provide an explanation for chosen answers to any of the questions above. (Please indicate the specific number of the question before providing your answer)

15. Other comments: (250 characters max.)

## Glossary

---

### Terms and Definition

**Knowledge:** Degree to which the CHW has the theoretical or practical understanding of the function and tasks assigned to him/her

**Competencies:** Degree to which the CHW has the skills necessary to carry out the tasks assigned to him/her

**Motivation:** An individual's degree of willingness to exert and maintain effort on assigned tasks

**Morale:** The mental and emotional condition (as of enthusiasm, confidence, etc.) of an individual CHW with regard to the function or tasks at hand

**Satisfaction:** Degree to which CHWs derive personal satisfaction from serving the community, providing good quality services

**Absenteeism:** Rate at which those CHWs who are supposed to be delivering services habitually fail to appear to carry out their tasks

**Service delivery:** Quantity and quality of promotional, preventive, and curative services CHWs provide to community members

**Responsiveness:** The degree to which an individual CHW responds to the needs of an individual client or group within a reasonable time period

**Productivity:** A CHW's total output per unit of total input

**Attrition:** The rate at which practicing CHWs resign, retire, or abandon their positions over time

**Advancement:** The rate at which CHWs are advancing in their skills, competencies, formal responsibilities, and formal status within the community and the formal health system over time

**Access:** Client's physical and social access to essential services delivered by CHWs

**Coverage:** The coverage of selected health services among the population served by CHWs

**Quality:** The quality of services rendered by CHWs

**Health care-seeking behaviour:** Client in need of essential services and with access to CHWs is routinely seeking and using promotional, preventive and/or curative services CHWs offer

**Health-promoting behaviour in home:** Client has adopted health-promoting behaviours in the home as a result of contact with CHWs

**Satisfaction:** Client's reported degree of satisfaction with the services rendered by CHWs

**Cost savings:** Money not spent by client that he/she otherwise would have spent (on transportation and other items) in the absence of a CHW

**Patient health:**

Change in client's state of illness, wellness, survival

**Morbidity:** Change in the prevalence of serious illness in the population served by CHWs

**Mortality:** Change in the level of mortality in the population served by CHWs

**Fertility rate:** The ratio of live births in a CHW-served area to the population of that area expressed per 1,000 population per year

**Equity:** Degree to which access, coverage, or morbidity/mortality levels vary among different socio-economic or socially defined sub-groups in the population served by CHWs
